# Supplementary material
Source: Elsevier journal article supplement (https://www.sciencedirect.com/science/article/pii/S1413355522000776)
Supplement: mmc1 [file S1413355522000776:mmc1.doc]

**SUPPLEMENTARY FILE**

**Screening**

**Included**

**Eligibility**

**Identification**

Electronic database searching: CINAHL (119), Cochrane (278), Embase (305), PubMed (262), Web of Science (292), SciELO (2), SCOPOUS (485), and LILACS (13) - (n = 1756)

Records duplicates
(n = 968)

Records screened
(n = 788)

Records excluded on title and abstract (n = 688)

Full-text articles assessed for eligibility
(n = 100)

Full-text articles excluded

(n = 59)

Studies included in qualitative synthesis

(n = 61)

electronic search (41), systematic reviews (13), manual search (7)

Studies included in meta-analysis

Length of hospital stay: ATVV = 9; TKS = 13; KMC = 17

Final weight: ATVV = 1; TKS = 11; KMC = 9

Daily weight gain: ATVV = 2; TKS = 14; KMC = 10

Total weight gain: ATVV = 2; TKS = 6; KMC = 1

Search on the references of the included studies
(n = 7)

Search on systematic reviews
(n = 13)

**Figure 1**. Flow of the studies in the systematic review


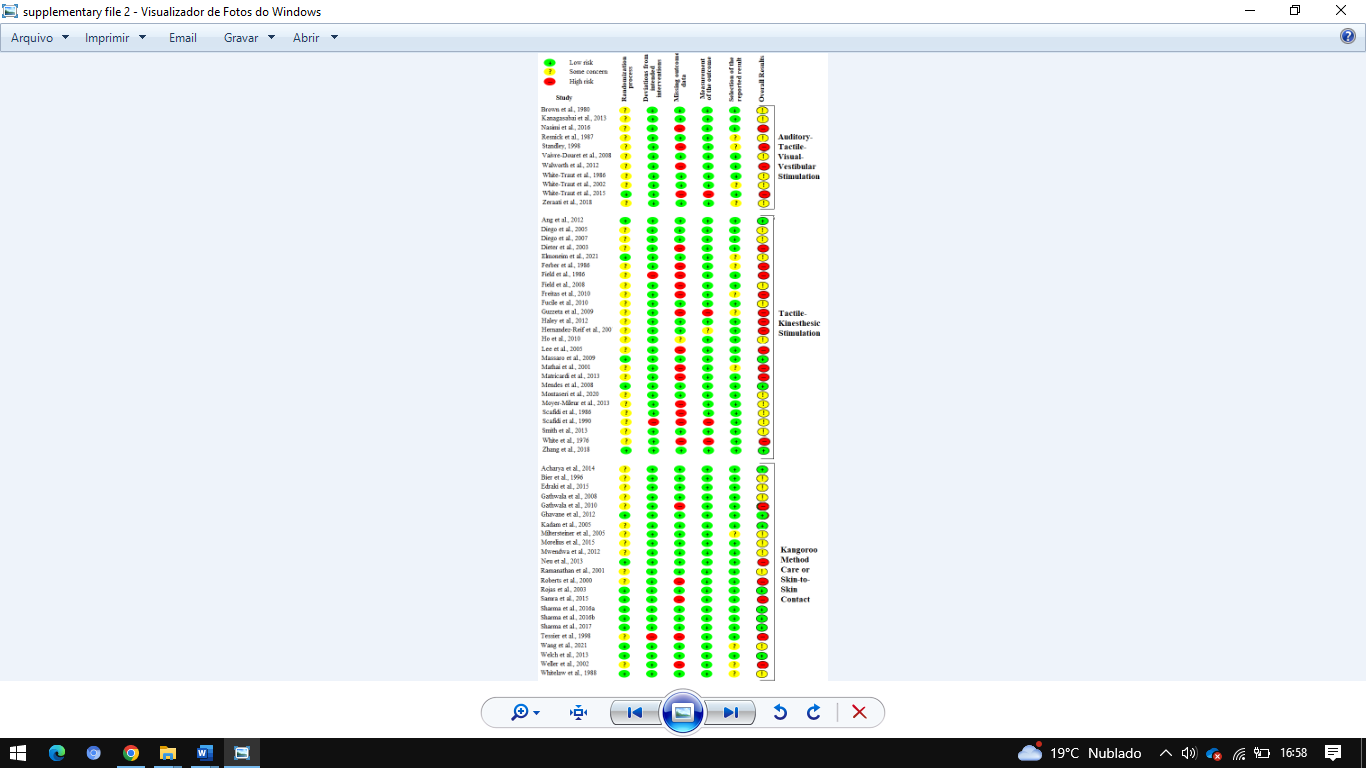


**Figure 2**. Risk of bias summary for each randomized controlled trial by using the Cochrane risk-of-bias tool for randomized trials (RoB 2).
